# Supplementary material
Source: publisher figshare collection journal article supplement (https://osapublishing.figshare.com/ndownloader/files/31075729)
Supplement: Supplementary file 1 [file 31075729]

## Method of space object detection by wide field of view telescope based on its following error: supplement

**WENBO YANG,<sup>1,2,3</sup> YAN ZHAO,<sup>1,\*</sup> MING LIU,<sup>2</sup> AND DELONG LIU<sup>2</sup>**

<sup>1</sup>*College of Communication Engineering, Jilin University, Changchun 130012, China*

<sup>2</sup>*Changchun Observatory, National Astronomical Observatories CAS, Changchun 130117, China*

<sup>3</sup>*yangwb@cho.ac.cn*

*\*zhao\_y@jlu.edu.cn*

---

This supplement published with Optica Publishing Group on 13 October 2021 by The Authors under the terms of the [Creative Commons Attribution 4.0 License](https://creativecommons.org/licenses/by/4.0/) in the format provided by the authors and unedited. Further distribution of this work must maintain attribution to the author(s) and the published article's title, journal citation, and DOI.

Supplement DOI: <https://doi.org/10.6084/m9.figshare.16732960>

Parent Article DOI: <https://doi.org/10.1364/OE.440842>

# A method of space object detection with a wide field of view telescope based on its following error: supplemental document

## Supplementary S1: A clustering algorithm for associating the coordinates of suspicious objects

Suppose there are  $P$  lists of suspicious objects and their set is  $\{L_1, L_2, \dots, L_N, \dots, L_P\}$ , where,  $L_1 = \{(x_0, y_0)^1, (x_1, y_1)^1, \dots, (x_i, y_i)^1, \dots, (x_n, y_n)^1\}$  is the set of coordinates in List 1,  $L_2 = \{(x_0, y_0)^2, (x_1, y_1)^2, \dots, (x_i, y_i)^2, \dots, (x_o, y_o)^2\}$  is the set of coordinates in List 2,  $L_N = \{(x_0, y_0)^N, (x_1, y_1)^N, \dots, (x_i, y_i)^N, \dots, (x_p, y_p)^N\}$  is the set of coordinates in List  $N$ , and  $L_P = \{(x_0, y_0)^P, (x_1, y_1)^P, \dots, (x_i, y_i)^P, \dots, (x_q, y_q)^P\}$  is the set of coordinates in List  $P$ .

Since the 1st frame has no corresponding list of the suspicious objects, let  $L_0 = \{(x_0, y_0)^0, (x_1, y_1)^0, \dots, (x_k, y_k)^0, \dots, (x_r, y_r)^0\}$  be the set of coordinates of all the stars in the 1st frame.

The specific steps of the association in coordinates are as follows.

---

### Algorithm S1 A clustering algorithm for associating the coordinates

---

**Step 1:** All the feature vectors in the set  $L_1$  are regarded as cluster centers. For example, let the center of cluster  $w_0$  is  $z_0 = (x_0, y_0)^1$ ; let the center of cluster  $w_1$  is  $z_1 = (x_1, y_1)^1$ ; and so on; let the center of cluster  $w_k$  is  $z_k = (x_i, y_i)^1$ ; let the center of cluster  $w_n$  is  $z_n = (x_n, y_n)^1$ .

**Step 2:** The existing cluster are  $w_0, w_1, \dots, w_k, \dots, w_n$  and the existing cluster centers are  $z_0, z_1, \dots, z_k, \dots, z_n$ . The distance is calculated between the feature vector  $l_i^2 = (x_i, y_i)^2$  in the set  $L_2$  and each cluster center  $z_j (j = 0, 1, \dots, k, \dots, n)$ . If it is true that  $d_{ij} > T (j = 0, 1, \dots, n)$ , then  $l_i^2$  is the center of the new cluster  $w_{n+1}$ , i.e.  $z_{n+1} = l_i^2$ . If it is true that  $d_{ik} \leq T$  and  $d_{ik} = \min_{j=0}^n [d_{ij}]$ , then it is judged that  $l_i^2 \in w_k$  and it is set that  $z_k = l_i^2$  at the same time.

**Step 3:** The existing cluster are  $w_0, w_1, \dots, w_k, \dots, w_n, \dots, w_s$  and the existing cluster centers are  $z_0, z_1, \dots, z_k, \dots, z_n, \dots, z_s$ . The distance is calculated between the feature vector  $l_i^N = (x_i, y_i)^N$  in the set  $L_N$  and each cluster center  $z_j (j = 0, 1, \dots, k, \dots, n, \dots, s)$ . If it is true that  $d_{ij} > T (j = 0, 1, \dots, s)$ , then  $l_i^N$  is the center of the new cluster  $w_{s+1}$ , i.e.  $z_{s+1} = l_i^N$ . If it is true that  $d_{ik} \leq T$  and  $d_{ik} = \min_{j=0}^s [d_{ij}]$ , then it is judged that

---

---

$l_i^N \in w_k$  and it is set that  $z_k = l_i^N$  at the same time. It is checked that whether all the sets are classified into cluster, if they are all classified, go to step 4; otherwise, return to step 3.

**Step 4:** The existing cluster are  $w_0, w_1, \dots, w_k, \dots, w_n, \dots, w_r, \dots, w_t$ . The number of elements in each cluster is counted and the cluster with the most elements is selected, i.e.  $card(w_k) = \max\{card(w_0), \dots, card(w_k), \dots, card(w_t)\}$ . If it is true that  $card(w_k) \leq P$ , then the cluster  $w_k$  is the trajectory of the object in the image.

**Step 5:** If the feature vector  $l_i^1 = (x_i, y_i)^1$  in the set  $L_1$  belongs to the trajectory cluster  $w_k$ , then the distance  $d_{ij}$  is calculated between  $l_i^1 = (x_i, y_i)^1$  and each feature vector in the set  $L_0$ . If it is true that  $d_{ii} \leq T$  and  $d_{ii} = \min_{j=0}^r [d_{ij}]$ , then it is judged that  $l_i^0 \in w_k$ . The trajectory cluster  $w_k$  at this point is the trajectory of space object containing the 1st frame.

---

### Supplementary S2: The test for equivalent sine simulation

According to the equivalent sine simulation, when an object moves sinusoidally, the trajectory of the azimuthal axis of the telescope is

$$A = \theta_A \sin(\omega_A t), \quad (S1)$$

where,  $\theta_A = \frac{\dot{\theta}_A^2}{\ddot{\theta}_A}$ ,  $\omega_A = \frac{\ddot{\theta}_A}{\dot{\theta}_A}$ ,  $\dot{\theta}_A$  is the maximum velocity of the object in azimuth and  $\ddot{\theta}_A$  is the maximum acceleration in azimuth.

According to Table 1, the maximum velocity of the object can be set to 6 °/s and the maximum acceleration can be set to 1 °/s<sup>2</sup>, and the trajectory of the azimuth axis of the telescope is

$$A = 36 \sin\left(\frac{1}{6} t\right). \quad (S2)$$

Similarly, the trajectory of the altitude axis of the telescope is

$$h = 26.67 \sin\left(\frac{3}{40} t\right). \quad (S3)$$

The trajectory-following performance of telescope can be evaluated by the sinusoidal motion constructed with the parameters in Table 1. The test results are shown in Fig.S1. The gray curve represents the theoretical trajectory of the telescope (unit: degree), the blue curve represents the actual trajectory (unit: degree), and the red sampling points represents following error (unit: arc-second). The peaks and RMS of the following error are shown in Table S1. It can be seen that 1.2-meter survey telescope has excellent following accuracy and stability.

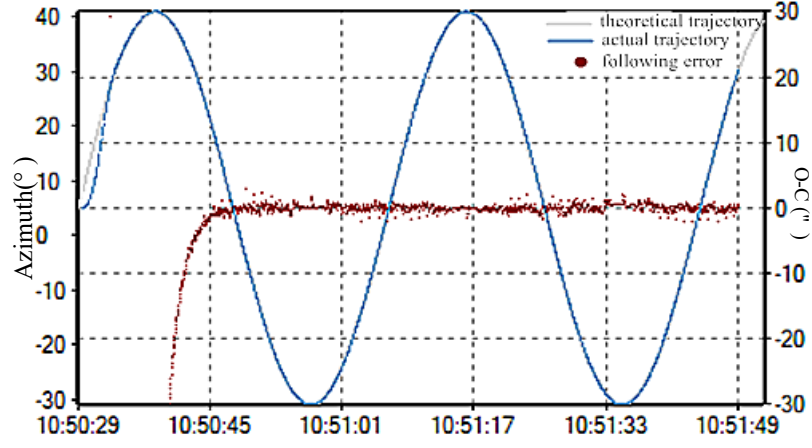

(a). The trajectory-following performance of azimuthal axis

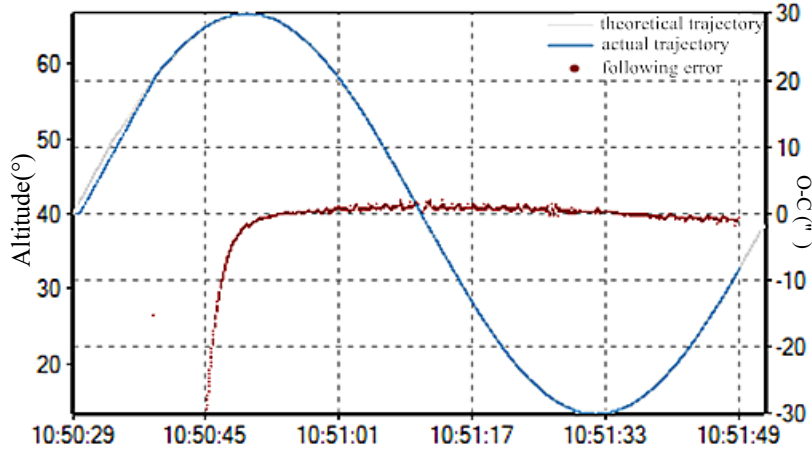

(b). The trajectory-following performance of the altitude axis.

Fig. S1. The trajectory-following performance of the telescope.

**Table S1. The peaks and RMS of the following error**

| Following error | Azimuth                         | Altitude                       |
|-----------------|---------------------------------|--------------------------------|
| Peak("):        | $\delta_A = 2.389$              | $\delta_h = 2.060$             |
| Peak(Pixels):   | $N_{\max}^\alpha = 1.671$       | $N_{\max}^\beta = 1.441$       |
| RMS("):         | $\sigma_A = 0.516$              | $\sigma_h = 0.742$             |
| RMS(Pixels):    | $N_{\text{RMS}}^\alpha = 0.362$ | $N_{\text{RMS}}^\beta = 0.519$ |
